# Supplementary material
Source: publisher figshare collection journal article supplement (https://sage.figshare.com/ndownloader/files/22692584)
Supplement: Supplementary file 1 [file 22692584]

## Appendix

| #  | Company or Project    | Main provider                           | Customer                                    | Value proposition                                                                                | Revenue structure                                 |
|----|-----------------------|-----------------------------------------|---------------------------------------------|--------------------------------------------------------------------------------------------------|---------------------------------------------------|
| 1  | OVO Energy            | power retailer                          | households, commercial (public), industrial | energy cost saving, clean energy production, bundled services, various rate schedules and brands | power sale, customer acquisition                  |
| 2  | Good Energy           | power generation company/power retailer | households, commercial (public), industrial | energy cost saving, clean energy production                                                      | power sale                                        |
| 3  | Ecotricity            | power generation company/power retailer | households, commercial (public), industrial | energy cost saving, clean energy production, bundled services                                    | customer acquisition, power & other products sale |
| 4  | Utility Warehouse     | ICT company                             | households, commercial (public), industrial | various rate schedules and brands, bundled services, monetary incentives                         | power & other products sale                       |
| 5  | First Utility         | power retailer                          | households, commercial (public), industrial | various rate schedules and brands                                                                | power sale                                        |
| 6  | British Gas           | utility (vertical integrated)           | households                                  | bundled services, controlling energy consumption                                                 | power & other products sale, service fee          |
| 7  | Tempus Energy         | energy management company               | commercial (public), industrial             | energy cost saving                                                                               | revenue share                                     |
| 8  | EnBW                  | utility (vertical integrated)           | households, commercial (public), industrial | various rate schedules and brands                                                                | power sale                                        |
| 9  | MVV Energie           | power generation company/power retailer | commercial (public)                         | energy cost saving, local energy, bundled services                                               | power & other products sale, asset sale           |
| 10 | EWS                   | power retailer                          | households, commercial (public), industrial | energy cost saving, clean energy production, stable supply                                       | power sale, operation cost saving                 |
| 11 | Greenpeace Energy     | renewable energy company                | households, commercial (public), industrial | clean energy production                                                                          | power sale                                        |
| 12 | Stadtwerke Heidelberg | local government                        | households, commercial (public), industrial | local energy, clean energy production, supporting local public projects, bundled services        | power sale, customer acquisition                  |
| 13 | Stadtwerke Karlsruhe  | local government                        | households, commercial (public), industrial | local energy, clean energy production, supporting local public projects, bundled services        | power sale, customer acquisition                  |
| 14 | Krafttrigen           | local government                        | households, commercial (public), industrial | local energy, clean energy production, bundled services, improving convenience                   | power sale, customer acquisition                  |

|    |                       |                                         |                                             |                                                                                                     |                                                         |
|----|-----------------------|-----------------------------------------|---------------------------------------------|-----------------------------------------------------------------------------------------------------|---------------------------------------------------------|
| 15 | NRG Energy            | utility(vertical integrated)            | households, commercial (public), industrial | various rate schedules and brands                                                                   | power sale                                              |
| 16 | Direct Energy         | utility(vertical integrated)            | households, commercial (public), industrial | controlling energy consumption                                                                      | power sale                                              |
| 17 | Austin Energy         | utility(vertical integrated)            | households, commercial (public), industrial | clean energy production, controlling energy consumption                                             | power sale, operation cost saving, customer acquisition |
| 18 | OG&E                  | utility(vertical integrated)            | households, commercial (public), industrial | energy cost saving                                                                                  | operation cost saving                                   |
| 19 | PG&E                  | utility(vertical integrated)            | households, commercial (public), industrial | monetary incentives                                                                                 | operation cost saving                                   |
| 20 | PHI                   | utility(vertical integrated)            | households                                  | monetary incentives, energy cost saving                                                             | operation cost saving                                   |
| 21 | SCE                   | utility(vertical integrated)            | households                                  | bundled services, controlling energy consumption                                                    | service fee                                             |
| 22 | NV Energy             | utility(vertical integrated)            | households                                  | energy cost saving                                                                                  | operation cost saving                                   |
| 23 | SDG&E                 | utility(vertical integrated)            | households, commercial (public), industrial | stable supply                                                                                       | fund & government support                               |
| 24 | AMP                   | power retailer                          | households, commercial (public), industrial | clean energy production                                                                             | power sale                                              |
| 25 | AGL                   | power retailer                          | households, commercial (public), industrial | clean energy production, energy cost saving                                                         | power sale, operation cost saving                       |
| 26 | Energy Australia      | power generation company/power retailer | households, commercial (public), industrial | various rate schedules and brands                                                                   | customer acquisition                                    |
| 27 | Genesis Energy        | power retailer                          | households, commercial (public), industrial | bundled services, various rate schedules and brands, improving convenience, clean energy production | customer acquisition, asset sale                        |
| 28 | Flick Electric        | power retailer                          | households, commercial (public), industrial | energy cost saving                                                                                  | service fee                                             |
| 29 | Electric KIWI         | power retailer                          | households, commercial (public), industrial | free services                                                                                       | customer acquisition                                    |
| 30 | TEPCO Energy Partner  | power retailer                          | households, commercial (public), industrial | bundled services, various rate schedules and brands, improving convenience, monetary incentives     | customer acquisition                                    |
| 31 | Tohoku Electric Power | utility(vertical integrated)            | households, commercial (public), industrial | various rate schedules and brands, monetary incentives                                              | customer acquisition                                    |

|    |                        |                                         |                                                        |                                                                                                                                                  |                                                                              |
|----|------------------------|-----------------------------------------|--------------------------------------------------------|--------------------------------------------------------------------------------------------------------------------------------------------------|------------------------------------------------------------------------------|
| 32 | TOKYO GAS              | oil & gas company                       | households, commercial (public), industrial            | bundled services, various rate schedules and brands, monetary incentives                                                                         | customer acquisition, service fee                                            |
| 33 | Shizuoka Gas & Power   | oil & gas company                       | households, commercial (public), industrial            | clean energy production, bundled services, improving convenience                                                                                 | power & other products sale, fund & government support, customer acquisition |
| 34 | JX Nikko Niseki Energy | oil & gas company                       | households                                             | bundled services, monetary incentives                                                                                                            | power & other products sale, customer acquisition                            |
| 35 | showa-shell            | oil & gas company                       | households                                             | bundled services, monetary incentives                                                                                                            | power & other products sale, customer acquisition                            |
| 36 | K-Opticom              | ICT company                             | households                                             | bundled services                                                                                                                                 | power & other products sale, customer acquisition                            |
| 37 | Rakuten                | ICT company                             | households, commercial (public)                        | monetary incentives, improving convenience, energy cost saving                                                                                   | power sale, service fee, operation cost saving                               |
| 38 | EnerNOC                | energy management company               | commercial (public), industrial, utilities             | energy cost saving, revenue through market participation, attracting customers, power system stabilization and efficiency                        | service fee, solution sale                                                   |
| 39 | Innovari               | energy management company               | utilities                                              | attracting customers, power system stabilization and efficiency                                                                                  | service fee, solution sale                                                   |
| 40 | Restore                | energy management company               | commercial (public), industrial, utilities             | energy cost saving, revenue through market participation, attracting customers, power system stabilization and efficiency, improving convenience | service fee, solution sale, customer acquisition                             |
| 41 | Ohmoconnect            | energy management company               | households, commercial (public)                        | energy cost saving, improving convenience, controlling energy consumption                                                                        | service fee, customer acquisition                                            |
| 42 | Encycle                | energy management company               | households, commercial (public)                        | energy cost saving, revenue through market participation                                                                                         | service fee                                                                  |
| 43 | Lichblick              | power generation company/power retailer | households, commercial (public)                        | clean energy production, energy cost saving, revenue through market participation                                                                | power sale, service fee                                                      |
| 44 | Comverge               | energy management company               | households, commercial (public), industrial, utilities | energy cost saving, improving convenience, controlling energy consumption, attracting customers, power system stabilization and efficiency       | service fee, solution sale, customer acquisition                             |

|    |                          |                                                                          |                                                        |                                                                                                                                            |                                               |
|----|--------------------------|--------------------------------------------------------------------------|--------------------------------------------------------|--------------------------------------------------------------------------------------------------------------------------------------------|-----------------------------------------------|
| 45 | EcoFactor                | energy management company                                                | households, commercial (public), industrial, utilities | energy cost saving, improving convenience, controlling energy consumption, attracting customers, power system stabilization and efficiency | service fee, customer acquisition             |
| 46 | Opwer                    | energy management company                                                | utilities                                              | attracting customers, power system stabilization and efficiency                                                                            | service fee, solution sale                    |
| 47 | Tendrill                 | energy management company                                                | utilities                                              | attracting customers, power system stabilization and efficiency                                                                            | service fee, solution sale                    |
| 48 | Gridpoint Energy         | energy management company                                                | commercial (public), industrial                        | controlling energy consumption, energy cost saving                                                                                         | service fee                                   |
| 49 | Bule Pillar              | energy management company                                                | commercial (public), industrial                        | energy cost saving, controlling energy consumption                                                                                         | service fee                                   |
| 50 | MeteoViva                | energy management company                                                | commercial (public), industrial                        | energy cost saving                                                                                                                         | service fee                                   |
| 51 | Ceiva Energy             | energy management company                                                | utilities                                              | attracting customers, power system stabilization and efficiency                                                                            | service fee, solution sale                    |
| 52 | Rainforest Automation    | energy management company                                                | utilities                                              | attracting customers, power system stabilization and efficiency                                                                            | service fee, solution sale                    |
| 53 | Wiser/Schneider Electric | energy management company                                                | utilities                                              | attracting customers, power system stabilization and efficiency                                                                            | service fee, solution sale                    |
| 54 | Invenergy                | renewable energy company                                                 | industrial, utilities                                  | clean energy production, energy cost saving                                                                                                | asset sale, lease, solution sale              |
| 55 | SunEdison                | renewable energy company                                                 | industrial, utilities                                  | clean energy production, energy cost saving                                                                                                | asset sale, lease, solution sale              |
| 56 | AES Energy Storage       | power generation company/renewable energy company/energy storage company | industrial, utilities                                  | power system stabilization and efficiency                                                                                                  | asset sale, lease, solution sale              |
| 57 | Ecoulit                  | energy storage company                                                   | industrial, utilities                                  | power system stabilization and efficiency                                                                                                  | asset sale, lease, solution sale              |
| 58 | Ambri                    | energy storage company                                                   | industrial, utilities                                  | power system stabilization and efficiency                                                                                                  | asset sale, lease, solution sale              |
| 59 | Stem                     | energy storage company                                                   | commercial (public), industrial                        | energy cost saving, clean energy production, stable supply                                                                                 | service fee, asset sale, lease                |
| 60 | Green Charge Networks    | energy storage company                                                   | commercial (public), industrial                        | energy cost saving, clean energy production                                                                                                | asset sale, lease                             |
| 61 | Yunicos                  | energy storage company                                                   | commercial (public), industrial, utilities             | energy cost saving, clean energy production, power system stabilization and efficiency                                                     | asset sale, lease, service fee, solution sale |

|    |                    |                           |                                                        |                                                                                        |                                                              |
|----|--------------------|---------------------------|--------------------------------------------------------|----------------------------------------------------------------------------------------|--------------------------------------------------------------|
| 62 | SolarCity          | renewable energy company  | households, commercial (public), industrial, utilities | energy cost saving, clean energy production                                            | lease, service fee                                           |
| 63 | Sungevity          | renewable energy company  | households, commercial (public)                        | energy cost saving, clean energy production                                            | asset sale, lease                                            |
| 64 | Sonnen             | energy storage company    | households                                             | energy cost saving, clean energy production                                            | asset sale, lease, service fee                               |
| 65 | Ice Energy         | energy storage company    | households, commercial (public), industrial, utilities | energy cost saving, clean energy production, power system stabilization and efficiency | asset sale, lease                                            |
| 66 | Advanced Microgrid | energy storage company    | households, commercial (public), industrial, utilities | energy cost saving, clean energy production, power system stabilization and efficiency | asset sale, lease                                            |
| 67 | Vchage             | energy management company | households, commercial (public), industrial            | energy cost saving                                                                     | asset sale, lease                                            |
| 68 | Sunverge           | energy management company | utilities                                              | power system stabilization and efficiency, attracting customers                        | asset sale, lease                                            |
| 69 | Solar Grid Storage | energy storage company    | utilities                                              | power system stabilization and efficiency                                              | asset sale, lease                                            |
| 70 | DONG Powerhub      | energy management company | industrial, utilities                                  | power system stabilization and efficiency                                              | asset sale, lease                                            |
| 71 | Juicebox Energy    | energy storage company    | households, commercial (public), industrial            | energy cost saving, clean energy production                                            | asset sale, power sale                                       |
| 72 | Solairedirect      | renewable energy company  | households, commercial (public), industrial            | energy cost saving, clean energy production, improving convenience                     | asset sale, lease, customer acquisition                      |
| 73 | SunRun             | renewable energy company  | households                                             | energy cost saving, improving convenience, clean energy production                     | asset sale, lease, customer acquisition                      |
| 74 | Spruce             | renewable energy company  | commercial (public), industrial                        | energy cost saving, improving convenience, clean energy production                     | fund & government support, service fee, customer acquisition |
| 75 | Vivint Solar       | renewable energy company  | households, commercial (public), industrial            | energy cost saving, clean energy production                                            | asset sale, power sale                                       |
| 76 | Vector             | renewable energy company  | households, commercial (public), industrial            | energy cost saving, clean energy production                                            | asset sale, power sale, lease                                |
| 77 | First Solar        | renewable energy company  | industrial, utilities                                  | energy cost saving, clean energy production                                            | asset sale, power sale, lease                                |
| 78 | Juwi America       | renewable energy company  | industrial, utilities                                  | energy cost saving, clean energy production                                            | asset sale, power sale, lease                                |
| 79 | NexAmp             | renewable energy company  | households                                             | energy cost saving, clean energy production                                            | asset sale, service fee                                      |

|    |                                               |                                                               |                                             |                                                                                   |                                                   |
|----|-----------------------------------------------|---------------------------------------------------------------|---------------------------------------------|-----------------------------------------------------------------------------------|---------------------------------------------------|
| 80 | Blue Wave                                     | renewable energy company                                      | households                                  | energy cost saving, clean energy production                                       | asset sale, power sale, lease                     |
| 81 | Mosaic                                        | renewable energy company                                      | households                                  | energy cost saving, clean energy production                                       | service fee                                       |
| 82 | Open Utiltiy                                  | ICT company                                                   | commercial (public), industrial             | selecting preferred provider, energy cost saving                                  | fund & government support                         |
| 83 | Vandebon                                      | ICT company                                                   | households, commercial (public), industrial | selecting preferred provider, energy cost saving                                  | service fee                                       |
| 84 | Yeloha                                        | renewable energy company                                      | households, commercial (public), industrial | improving convenience, energy cost saving                                         | service fee & revenue share                       |
| 85 | Tesla                                         | automobile company                                            | households, commercial (public), industrial | improving convenience, free services, energy cost saving, clean energy production | customer acquisition, power & other products sale |
| 86 | BYD                                           | automobile company                                            | households, commercial (public), industrial | improving convenience, energy cost saving                                         | customer acquisition, power & other products sale |
| 87 | NEBs <sup>1)</sup> (demand management market) | utility(vertical integrated), energy management company       | commercial (public), industrial             | energy cost saving, revenue through market participation                          | service fee, operation cost saving                |
| 88 | NEBs(ESS)                                     | ICT company                                                   | commercial (public), industrial             | energy cost saving                                                                | revenue share                                     |
| 89 | NEBs (energy self-sufficient island)          | energy storage company, ICT company, renewable energy company | local governments                           | energy cost saving, clean energy production                                       | asset sale, power sale, fund & government support |
| 90 | NEBs (solar energy rental)                    | renewable energy company                                      | households, commercial (public), industrial | energy cost saving, clean energy production                                       | lease, fund & government support, revenue share   |
| 91 | NEBs (electric vehicle)                       | automobile company, ICT company, energy management company    | households, commercial (public), industrial | energy cost saving                                                                | power sale, fund & government support             |
| 92 | NEBs (residential DR)                         | utility(vertical integrated), energy management company       | households                                  | energy cost saving, revenue through market participation                          | operation cost saving, revenue share              |
| 93 | NEBs (peer to peer electricity trading)       | utility(vertical integrated)                                  | households, commercial (public)             | energy cost saving                                                                | fund & government support                         |
| 94 | NEBs (business prosumers)                     | renewable energy company                                      | commercial (public), industrial             | energy cost saving, clean energy production                                       | power sale                                        |
| 95 | NEBs (EV charging at gas stations)            | oil & gas company                                             | households, commercial (public), industrial | improving convenience                                                             | power sale                                        |

Note 1) NEBs indicates new energy businesses which are supported by Korean government.
